## CLINICAL INVESTIGATIONS

Anesthesiology

1998; 89:823-30

© 1998 American Society of Anesthesiologists, Inc.

Lippincott Williams & Wilkins

# Intravenous Almitrine Bismesylate Reversibly Induces Lactic Acidosis and Hepatic Dysfunction in Patients with Acute Lung Injury

Afef B'chir, M.D.,\* Alexandre Mebazaa, M.D., Ph.D.,† Marie-Reine Losser, M.D., Ph.D.,‡ Michel Romieu, M.D.,† Didier Payen, M.D., Ph.D.‡

**Background:** Intravenous almitrine, which augments hypoxic pulmonary vasoconstriction, is used for short-term improvement of arterial oxygenation. However, recent research has suggested a potentially harmful effect on lactate metabolism and hepatic function.

**Methods:** Arterial oxygenation, hemodynamic parameters, plasma lactate, and hepatic function were monitored prospectively in 25 patients with acute lung injury (defined as a ratio of arterial oxygen pressure to inspiratory oxygen fraction  $\leq 150$  mmHg) who were treated with intravenous almitrine. In 21 of 25 patients, acute lung injury was related to primary lung lesions, including pneumonia, postcardiosurgical atelectasis, and lung contusions.

**Results:** Intravenous almitrine increased the ratio of arterial oxygen pressure to inspiratory oxygen fraction from  $93 \pm 33$  mmHg to  $207 \pm 107$  mmHg (mean  $\pm$  SD). In eight patients (three men), the plasma lactate concentration increased by an average of  $+3.5 \pm 1.8$  mM, and the pH and bicarbonate concentration both decreased during the first 24 h of treatment. In this group of patients, the total bilirubin concentration was elevated before almitrine administration, and the results of other hepatic function tests, such as aspartate aminotransferase, alanine aminotransferase, and prothrombin time, were altered by almitrine administration. Therefore, intravenous almitrine was discontinued. Lactic acidosis and hepatic dysfunction improved. In the other 17 patients (14 men), the plasma lactate concentration and the hepatic function tests remained unaltered during intravenous almitrine therapy for  $>60$  h. Univariate and multivariate analyses revealed that an abnormal plasma concentration of total bilirubin before almitrine administration and female gen-

der were the two factors significantly linked with lactic acidosis during almitrine infusion.

**Conclusions:** This study confirms that intravenous almitrine greatly improves arterial oxygenation in patients with acute lung injury but may also induce lactic acidosis and hepatic dysfunction. The coexistence of lactic acidosis and hepatic dysfunction in the same patients strongly suggests that the liver is the primary source of intravenous almitrine-induced lactic acidosis. (Key words: Acute respiratory distress syndrome; hypoxic pulmonary vasoconstriction; inhaled nitric oxide; liver function.)

ORAL almitrine bismesylate has been used for many years to improve gas exchange in patients with chronic obstructive pulmonary disease. Although the mechanism of action of almitrine is uncertain, two clinical effects have been well documented: (1) an improvement of minute ventilation in spontaneously breathing patients with a decreased pressure of carbon dioxide in arterial blood *via* a stimulation of the chemoreflex and (2) a vasoconstrictor effect on pulmonary vessels that apparently predominates in hypoxic zones, improving the ventilation-perfusion matching, oxygen pressure in arterial blood ( $P_{aO_2}$ ) and decreasing the venous admixture (for a review, see references 1 and 2). Many side effects have been reported after prolonged oral treatment, including increased dyspnea, gastrointestinal upset, and peripheral neuropathy that affects the myelinated fibers of the lower limbs.<sup>2,3</sup> In addition, the association of weight loss and worsening pulmonary hypertension has reduced considerably the use of almitrine for the long-term treatment of patients with chronic obstructive pulmonary disease.

Intravenous almitrine has been used successfully for short-term improvement of  $P_{aO_2}$  in patients with acute respiratory failure.<sup>4,5</sup> At low doses ( $<10 \mu\text{g} \cdot \text{kg}^{-1} \cdot \text{min}^{-1}$ ), intravenous almitrine alone improves intrapulmonary shunt.<sup>1</sup> Such improvement in  $P_{aO_2}$  has been attributed to an intrapulmonary blood flow redistribution from the poorly ventilated zones toward the normal

\* Instructor.

† Assistant Professor.

‡ Professor and Chairman.

Received from the Département d'Anesthésie-Réanimation, Hôpital Lariboisière, Assistance Publique-Hôpitaux de Paris. Submitted for publication December 15, 1997. Accepted for publication May 15, 1998. Supported by a grant from DSPT5, Ministère de l'Enseignement Supérieur et de la Recherche, Université Paris VII-Denis Diderot, Paris, and Direction de la Recherche Clinique, Assistance-Publique-Hôpitaux de Paris.

Address reprint requests to Dr. Payen: Hôpital Lariboisière, 2 Rue A. Paré, 75475 Paris Cedex 10, France. Address electronic mail to: dpayen.lariboisiere@in vivo.edu



zones.<sup>5,6</sup> Such redistribution has been related to a preferential pulmonary vascular contraction in hypoxic zones. The recent development of inhaled therapies, such as nitric oxide (NO) and prostacyclin, to manipulate the flow component of the ventilation-perfusion ratio prompted us and others<sup>7-9</sup> to combine these therapies with almitrine to optimize the  $\text{Pa}_{\text{O}_2}$  of severely hypoxic patients. However, such improvement in the ratio of  $\text{Pa}_{\text{O}_2}$  to the inspiratory fraction of oxygen ( $\text{Fi}_{\text{O}_2}$ ) might be "cosmetic," because most deaths after acute respiratory distress syndrome (ARDS) were related to multiple organ failure.<sup>10</sup> Accordingly, the use of potentially toxic substances, such as inhaled NO or almitrine must be balanced in terms of the benefit-to-risk ratio. Scant information exists regarding side effects of short-term intravenous almitrine treatment in patients in the intensive care unit. Sicsic *et al.*<sup>11</sup> reported severe hepatic cytolysis during intravenous almitrine treatment in a patient with posttraumatic ARDS. In the current article, we report the use of almitrine in 25 consecutive patients with acute lung injury (ALI). Almitrine was associated with lactic acidosis and impaired results of hepatic function tests in 30% of the patients. These two side effects were reversed after almitrine was discontinued.

## Methods

### Patients

This survey was approved by the human ethics committee of the institute, and written consent was obtained from patients or the next of kin. Twenty-five consecutive tracheally intubated and ventilated (volume-cycled) patients with severe ALI, defined as a  $\text{Pa}_{\text{O}_2}:\text{Fi}_{\text{O}_2}$  ratio  $\leq 150$  mmHg, and treated with almitrine after therapeutic optimization (see therapeutic strategy) were included prospectively. Among these, eight had ARDS (Murray score  $> 2.5$ ) based on classic criteria, including bilateral lung infiltrates shown on a chest roentgenograph and a thoracic computed tomograph and an absence of cardiac failure assessed by echocardiography, a pulmonary artery occlusion pressure  $< 18$  mmHg, or both.<sup>12</sup> The 17 other patients had focal lung lesions that involved  $< 50\%$  of the total lung surface, as judged by four independent, blinded observers by chest roentgenography and computed tomographic assessment of parenchymal consolidation.

### Measurements

Twelve patients had an oximetric thermodilution pulmonary artery catheter (Abbott Laboratories, Chicago,

IL) placed that allowed measurement of mean pulmonary arterial, right atrial, and pulmonary artery occlusion pressures. The other 13 patients were monitored using central venous catheters and transesophageal descending aortic flow velocity (ODM 2; Abbott Laboratories, Rungis, France).<sup>13</sup> In all patients, arterial pressure was measured *via* arterial catheter (Seldicath catheter; Plastimed Laboratories, St. Leu la Forêt, France). Arterial blood sampling allowed determination of arterial blood gases (ABL 300; Radiometer, Copenhagen, Denmark), prothrombin time (%), the coagulation factors II, V, and VII, aspartate aminotransferase (AST,  $n < 35$  IU/l), alanine aminotransferase (ALT,  $n < 56$  IU/l), total bilirubin ( $n < 17 \mu\text{M}$ ), alkaline phosphatase ( $n < 115$  IU/l), glucose ( $n$ , 4–5.5 mm) and lactate ( $n < 2$  mm,  $\pm 0.06$  mm at the precision test; Ektachem 700, Kodak, Rochester, NY). The cumulative dose of almitrine, the Logistic Organ Dysfunction System score,<sup>14</sup> and the Simplified Acute Physiology Score II<sup>15</sup> (both scores performed at the time of almitrine administration) were calculated also.

### Therapeutic Strategy

Patients with compromised arterial oxygenation were administered intravenous almitrine after preliminary therapeutic optimization that consisted of adequate fluid resuscitation (based on filling pressures and mixed venous oxygen saturation), appropriate use of vasoactive drugs to maintain blood pressure, determination of the best positive end-expiratory pressure level based on oxygen transport when it was available, and administration of inhaled NO at a dose of 4–15 ppm, as previously described.<sup>7,12</sup> Inhaled NO was administered continuously *via* fenestrated silicone catheter (1.3 mm diameter; Vygon, Paris, France) positioned within the endotracheal tube, at a flow rate adapted to provide a therapeutic fraction of 4–15 ppm. Potential NO toxicity was assessed by (1) the methemoglobin level determined daily by spectrophotometry (OSM2 Hemoximeter, Radiometer), which was consistently  $< 1.5\%$ , and by (2) NO and nitrogen dioxide ( $\text{NO}_2$ ) levels in both the inspired and expired limbs of the ventilator, measured twice a day by chemiluminescence (EcoPhysic, Massy, France). The  $\text{NO}_2$  level was always  $< 100$  ppb.

When the  $\text{Pa}_{\text{O}_2}:\text{Fi}_{\text{O}_2}$  ratio remained  $\leq 150$  mmHg after these modalities were used, patients were administered a continuous infusion of intravenous almitrine (Servier, Suresnes, France) through a central catheter. The dose of almitrine was titrated from  $2\text{--}8 \mu\text{g} \cdot \text{kg}^{-1} \cdot \text{min}^{-1}$  to achieve the best  $\text{Pa}_{\text{O}_2}:\text{Fi}_{\text{O}_2}$  ratio with the minimal amount



## INTRAVENOUS ALMITRINE IN PATIENTS WITH ACUTE LUNG INJURY

of almitrine.<sup>1</sup> Hemodynamic and biologic parameters were recorded before the administration of almitrine (T0) and every 12 h for 60 h in all patients (T12 to T60).

For the patients whose lactate concentration increased by more than +2 mM during the first 24 h of almitrine administration, almitrine was discontinued at 24 h (T24). For the other patients, in whom the plasma lactate concentration remained stable between T0 and T24, almitrine administration was continued at the same infusion rate for at least 36 h more (until T60). In all patients, NO inhalation was maintained at least until T60.

### Statistical Analysis

Mean values between groups were compared using two-way analysis of variance for subsequent measures. Intragroup comparisons were made using the Newman-Keuls test. Data are expressed as mean  $\pm$  SD, and  $P < 0.05$  was considered significant.

Potential univariate correlates of lactic acidosis were identified by chi-squared analysis for qualitative parameters and by the Mann-Whitney U test for quantitative parameters. Considering the small sample size, a logistic exact procedure was used for multivariate analysis (LogXact, Cytel Software).

## Results

Table 1 summarizes selected clinical characteristics of the 25 patients at the time of intravenous almitrine administration. The mean Logistic Organ Dysfunction System score was  $5 \pm 3$ , the Simplified Acute Physiology Score II was  $34 \pm 10$ , and the  $\text{PaO}_2:\text{FiO}_2$  ratio was  $93 \pm 33$  mmHg for the 25 patients. The causes of ALI were related mainly to primary lung lesions (21 of 25 patients), including pneumonia ( $n = 7$ ), postcardiosurgical atelectasia ( $n = 6$ ), and lung contusions after thoracic trauma ( $n = 4$ ).

Intravenous almitrine enhanced the  $\text{PaO}_2:\text{FiO}_2$  ratio by more than two times in the 25 patients included in our survey (table 2, fig. 1). The improvement in the  $\text{PaO}_2:\text{FiO}_2$  ratio was associated with an increased systolic pulmonary arterial pressure in the 12 patients with pulmonary artery catheters. The other measured hemodynamic parameters, including cardiac output, remained unchanged.

Eight patients had increased plasma lactate concentration during the first 24 h of intravenous almitrine administration—a  $+3.5 \pm 1.8$  mM increase compared with T0; these patients were included in a group labeled "high

lactate" (HL group, figs. 1 and 2). Figures 1 and 2 show that plasma lactate increased at 12 h and peaked at T24. Intravenous almitrine discontinuation in the HL group at T24 was followed by a decrease in plasma lactate level that returned to normal in all patients within 36 h. In parallel, the pH and the bicarbonate concentration decreased during intravenous almitrine infusion and returned to normal at T60. In contrast, intravenous almitrine did not alter the pH, the bicarbonate concentration, or the plasma lactate level between T0 and T60 in the 17 other patients who were included in the low-lactate group (LL group).

Impaired hepatic function also was observed in the HL group 24 h after intravenous administration of almitrine (fig. 2, table 3). The AST and ALT serum concentrations increased, whereas prothrombin time and factor VII decreased in the HL group. When intravenous almitrine was discontinued, factor VII returned to normal within 36 h, whereas the AST serum concentration and the prothrombin time remained altered, slowly improving in the next 3 or 4 days (data not shown). Total bilirubin, glucose, and alkaline phosphatase concentrations remained stable after almitrine administration in both groups, despite a greater baseline bilirubin level in the HL group. Intravenous almitrine did not alter hepatic function tests throughout the 60 h of observation in the LL group.

The amount of almitrine administered was greater in the HL group than in the LL group during the first 24 h ( $459 \pm 155$  mg for the HL group and  $370 \pm 113$  mg for the LL group;  $P < 0.05$ ) but was less over the 60 h because almitrine was discontinued in the HL group ( $459 \pm 55$  mg for the HL group and  $911 \pm 361$  mg for the LL group,  $P < 0.005$ ).

Figure 2 shows that despite the difference in plasma lactate concentrations and the hepatic function tests between the HL and LL groups, intravenous almitrine induced a similar improvement in the  $\text{PaO}_2:\text{FiO}_2$  ratio in both groups. Although almitrine was discontinued in the HL group at T24, the improvement in the  $\text{PaO}_2:\text{FiO}_2$  ratio lasted until T60 in the two groups.

Univariate analysis revealed that the level of bilirubin before almitrine administration and patient gender were predictive factors for the occurrence of lactic acidosis after almitrine administration, whereas age, catecholamine treatment, Logistic Organ Dysfunction System score, Simplified Acute Physiology Score II, and cause of ALI (ARDS *vs.* non-ARDS) were not. Therefore, as shown in figure 3, female patients were at high risk for the occurrence of lactic acidosis; five of eight were in the HL



Table 1. Clinical Characteristics of Patients with Acute Lung Injury

| Patient Number  | Age (yr)/Gender            | Diagnosis for Hypoxemia                 | LODS  | SAPS II | Pa <sub>O<sub>2</sub></sub> :Fi <sub>O<sub>2</sub></sub> | Drugs  | Outcome | Cause of Death     |
|-----------------|----------------------------|-----------------------------------------|-------|---------|----------------------------------------------------------|--------|---------|--------------------|
| <b>HL group</b> |                            |                                         |       |         |                                                          |        |         |                    |
| 1               | 57/F                       | <i>Proteus</i> pneumonia                | 4     | 33      | 150                                                      | E      | Alive   |                    |
| 2               | 62/F                       | Post cardiosurgical atelectasia         | 7     | 42      | 70                                                       | D + NE | Alive   |                    |
| 3               | 34/M                       | Post cardiosurgical atelectasia         | 5     | 40      | 66                                                       |        | Alive   |                    |
| 4               | 72/F                       | <i>Pseudomonas aeruginosa</i> pneumonia | 6     | 47      | 136                                                      |        | Alive   |                    |
| 5               | 38/F                       | <i>Legionella</i> pneumonia             | 4     | 23      | 89                                                       |        | Alive   |                    |
| 6               | 41/M                       | Lung hemorrhage                         | 5     | 40      | 88                                                       |        | Dead    | Massive hemoptysis |
| 7               | 32/M                       | Lung contusion                          | 8     | 45      | 72                                                       |        | Alive   |                    |
| 8               | 20/F                       | Fat embolism                            | 3     | 34      | 66                                                       |        | Dead    | Sepsis             |
| Mean ± SEM      | 45 ± 18<br>(F = 5, M = 3)  |                                         | 5 ± 2 | 37 ± 9  | 92 ± 33                                                  |        |         |                    |
| <b>LL group</b> |                            |                                         |       |         |                                                          |        |         |                    |
| 1               | 24/M                       | <i>Legionella</i> pneumonia             | 1     | 14      | 139                                                      |        | Dead    | Sepsis             |
| 2               | 45/M                       | Lung contusion                          | 8     | 51      | 59                                                       |        | Alive   |                    |
| 3               | 69/M                       | Post cardiosurgical atelectasia         | 4     | 31      | 66                                                       |        | Alive   |                    |
| 4               | 49/M                       | Post cardiosurgical atelectasia         | 6     | 36      | 71                                                       |        | Alive   |                    |
| 5               | 63/M                       | Post cardiosurgical atelectasia         | 8     | 41      | 144                                                      | NE     | Alive   |                    |
| 6               | 49/M                       | Gastric aspiration                      | 3     | 29      | 110                                                      |        | Alive   |                    |
| 7               | 31/M                       | Lung contusion                          | 4     | 32      | 140                                                      |        | Alive   |                    |
| 8               | 33/M                       | Lung contusion                          | 1     | 18      | 58                                                       |        | Alive   |                    |
| 9               | 18/M                       | Gastric aspiration                      | 3     | 25      | 53                                                       |        | Alive   |                    |
| 10              | 51/F                       | <i>Pneumococcal</i> pneumonia           | 1     | 27      | 52                                                       |        | Alive   |                    |
| 11              | 39/M                       | Sepsis                                  | 9     | 48      | 65                                                       |        | Alive   |                    |
| 12              | 30/F                       | <i>Pseudomonas aeruginosa</i> pneumonia | 10    | 50      | 74                                                       | E      | Dead    | Sepsis             |
| 13              | 46/M                       | Sepsis                                  | 6     | 33      | 120                                                      |        | Alive   |                    |
| 14              | 48/M                       | Post cardiosurgical atelectasia         | 1     | 23      | 141                                                      |        | Alive   |                    |
| 15              | 53/M                       | Sepsis                                  | 4     | 27      | 82                                                       |        | Dead    | Sepsis             |
| 16              | 31/M                       | Sepsis                                  | 8     | 46      | 85                                                       | E      | Alive   |                    |
| 17              | 38/F                       | <i>Pneumococcal</i> pneumonia           | 8     | 36      | 118                                                      |        | Alive   |                    |
| Mean ± SEM      | 42 ± 14<br>(F = 3, M = 14) |                                         | 5 ± 3 | 33 ± 11 | 93 ± 35                                                  |        |         |                    |

D = dobutamine; E = epinephrine; NE = norepinephrine.

group. In contrast, all male patients with normal initial levels of bilirubin were in the LL group (10 of 10). Initial bilirubin level and gender both were also found to be predictive factors when used in the multiple logistic exact model. In this case, the exact odds ratio for gender was 2.46 ( $P = 0.038$ ), and the  $\beta$  parameter for bilirubin (exact assumption) was 0.056 ( $P = 0.01$ ).

## Discussion

Intravenous almitrine consistently improved the Pa<sub>O<sub>2</sub></sub>:Fi<sub>O<sub>2</sub></sub> ratio in patients with ALI. Intravenous almitrine was also associated with lactic acidosis and impaired hepatic function in 30% ( $n = 8$ ) of our patients. Lactic acidosis and hepatic dysfunction appeared within 12 h of almi-



## INTRAVENOUS ALMITRINE IN PATIENTS WITH ACUTE LUNG INJURY

Table 2. Hemodynamic and Respiratory Effects of Almitrine

|                                           | n  | Before Almitrine Administration | T12        | T24        |
|-------------------------------------------|----|---------------------------------|------------|------------|
| MAP (mmHg)                                | 25 | 75 ± 11                         | 71 ± 12    | 71 ± 12    |
| PAPs (mmHg)                               | 12 | 41 ± 13                         | 45 ± 14*   | 46 ± 11*   |
| PAPm (mmHg)                               | 12 | 31 ± 10                         | 33 ± 10    | 32 ± 8     |
| PAPd (mmHg)                               | 12 | 23 ± 5                          | 24 ± 8     | 24 ± 6     |
| CO (L/min)                                | 12 | 5.8 ± 1.0                       | 5.9 ± 1.1  | 6.3 ± 1.1  |
| RAP                                       | 25 | 10 ± 4                          | 10 ± 4     | 10 ± 4     |
| PAoP                                      | 12 | 12 ± 2                          | 13 ± 2     | 12 ± 2     |
| PaO <sub>2</sub> /FiO <sub>2</sub> (Torr) | 25 | 93 ± 33                         | 207 ± 113† | 217 ± 107† |
| PaCO <sub>2</sub> (Torr)                  | 25 | 42 ± 10                         | 41 ± 11    | 43 ± 11    |

Data were recorded before and 12 and 24 h after almitrine administration (T12 and T24, respectively). Twelve patients had a pulmonary artery catheter (HL group, n = 6; LL group, n = 6). No difference was observed between the HL and LL groups; data were therefore pooled. MAP = mean arterial pressure; PAPs = systolic pulmonary arterial pressure; m = mean; d = diastolic; CO = cardiac output; RAP = right atrial pressure; PAoP = pulmonary artery occlusion pressure.

\*  $P < 0.05$  versus before.

†  $P < 0.001$  versus before.

trine administration and were reversed after drug discontinuation. In contrast, in the other 70% (n = 17) of patients, intravenous almitrine induced no change in any of the measured biologic parameters.

#### Effects of Almitrine on Arterial Oxygenation

Acute lung injury is characterized by impaired gas exchange caused by maldistribution of ventilation:perfusion ratios. The recent introduction of intravenous almitrine and inhaled NO dramatically modified the therapeutic management of hypoxemia in patients with ALI.<sup>1,8,9</sup> In our patients with ALI, the introduction of intravenous almitrine after therapeutic optimization, which included inhaled NO, increased the PaO<sub>2</sub>:FiO<sub>2</sub> ratio within 12 h from 93 ± 7 mmHg to 207 ± 23 mmHg ( $P < 0.001$ ). Improvement of the PaO<sub>2</sub>:FiO<sub>2</sub> ratio was observed in every patient observed, regardless of plasma lactate concentration and hepatic dysfunction.

Interestingly, the PaO<sub>2</sub>:FiO<sub>2</sub> ratio remained greater at T24 and T60 than at T0 in the HL group, even after almitrine was discontinued (fig. 2). This may be explained by the pharmacologic properties of almitrine:<sup>1,2</sup> (1) almitrine is highly bound (>99%) to low-density lipoprotein and its half-life is >24 h in humans; (2) hydroxy metabolites of almitrine show almitrine-like activity; and (3) because almitrine is mainly metabolized by the liver and excreted in bile, hepatic dysfunction in the HL group further prolonged almitrine and the half-lives of its metabolites, as previously described.<sup>16</sup>

#### Lactic Acidosis

Disturbances of acid-base equilibrium and particularly lactic acidosis are among the most frequent metabolic disorders seen in the intensive care unit. Hyperlactatemia may result from decreased lactate clearance, from increased lactate production related to any cause of local anaerobic metabolism or cellular dysfunction, or from both.

Much of the lactate produced by the body is cleared by the liver by gluconeogenesis and oxidative phosphorylation.<sup>17</sup> In our study, the coexistence of hyperlactatemia and hepatic dysfunction, in the HL group, suggests an impaired hepatic lactate clearance as a mechanism of hyperlactatemia. The lung, which is another site of mammalian lactate metabolism, may account for the origin of hyperlactatemia. Because lactate is a preferential energetic substrate for rat and Weddell seal lungs,<sup>18,19</sup> almitrine might have reduced the lactate lung uptake in our patients. More realistically, inflamed lungs may produce more lactate in the presence of almitrine. Such an hypothesis is confirmed by recent data about lung lactate production in critically ill patients.<sup>20</sup>

Other organs, such as the brain and the gut, and the erythrocytes are major lactate producers,<sup>17</sup> both in physiologic and pathophysiologic conditions. In our study,

Fig. 1. Individual data for the ratio of arterial oxygen pressure to inspiratory oxygen fraction (PaO<sub>2</sub>:FiO<sub>2</sub>) and plasma lactate concentration. The dashed line represents patients from the high-lactate group, and the solid line represents patients from the low-lactate group.

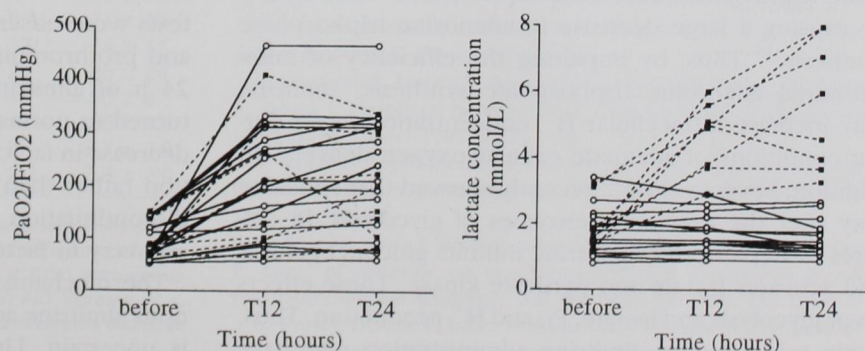



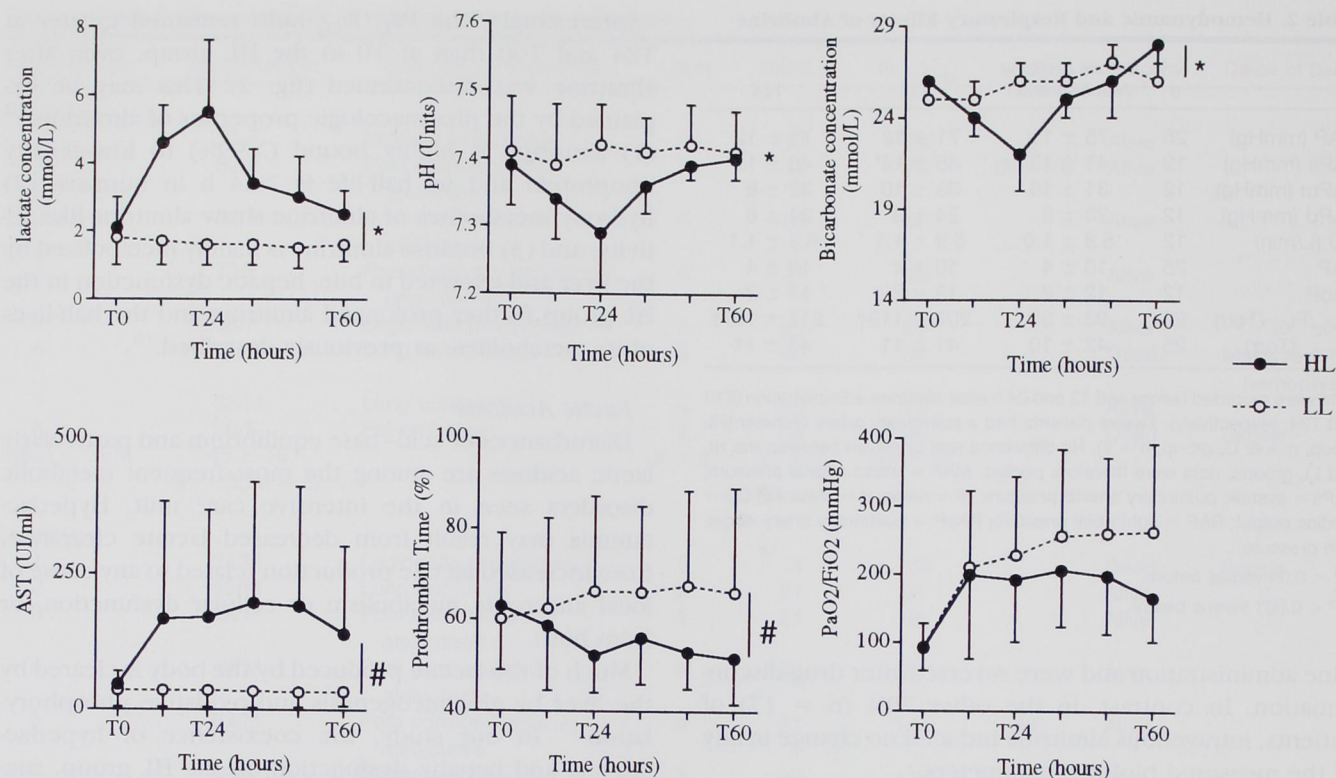

Fig. 2. Lactic acidosis and hepatic dysfunction follows almitrine administration in the high-lactate group; \* $P < 0.01$  and # $P < 0.03$ , both by two-way analysis of variance for repeated measures. Almitrine improves the ratio of arterial oxygen pressure to the inspiratory oxygen fraction  $\text{PaO}_2/\text{FiO}_2$  during time in both the high-lactate and the low-lactate groups ( $P < 0.001$ ). Although almitrine was discontinued at 24 h (T24), no difference was found between the high- and low-lactate groups.

almitrine-induced hyperlactatemia was associated with a decrease in pH and bicarbonate concentration. This acidosis probably is related to mitochondrial dysfunction, which is known to induce an accumulation of Pi and  $\text{H}^+$ .<sup>17</sup> Almitrine may affect mitochondrial function by reducing oxygen delivery to certain organs, but more likely by acting directly on mitochondrial adenosine triphosphatase activity, as previously suggested by several authors.<sup>21-23</sup> In mitochondria that are isolated from bovine heart and rat liver, almitrine decreased the adenosine triphosphate:adenosine diphosphate ratio, mainly by causing a large decrease in adenosine triphosphate synthesis.<sup>23</sup> Thus, by impairing the efficiency of mitochondrial adenosine triphosphate synthesis, almitrine may increase intracellular  $\text{H}^+$  concentration, even during conditions of adequate cellular oxygen delivery. In addition, Lervet *et al.*<sup>22</sup> recently showed that almitrine may alter the regulatory enzymes of glycolysis. In cultures of hepatocytes, almitrine inhibits gluconeogenesis and activates lactate and pyruvate kinase. These effects favor glycolysis and lactate, Pi, and  $\text{H}^+$  production. Thus, lactic acidosis after almitrine administration may have

been related, at least in part, to a direct intracellular effect of almitrine on glucose metabolism and mitochondrial function.

#### Alterations of Hepatic Function Tests

A preliminary report recently described an alteration in hepatic function tests in a patient with ARDS who was treated with almitrine.<sup>11</sup> It showed an increase in AST plasma concentrations to levels  $>1,000$  IU/l that decreased as soon as almitrine was discontinued. In our study, similar alterations in results of hepatic function tests were observed. The AST and ALT levels increased and prothrombin time and factor VII decreased within 24 h of almitrine administration, and these values returned to normal after almitrine was discontinued. The decrease in factor VII is related to a true hepatic dysfunction rather than to a vitamin K deficiency, because the discontinuation of almitrine was followed by a quick recovery in factor VII level.

The mechanism of hepatic dysfunction after intravenous almitrine administration in patients in the HL group is uncertain. Liver injury is unlikely to be related to



# INTRAVENOUS ALMITRINE IN PATIENTS WITH ACUTE LUNG INJURY

hemodynamic alterations because no difference was observed before and after almitrine administration, except for an increase in pulmonary artery systolic pressure (table 1). In addition, no difference was observed between the HL and LL groups. Hepatic dysfunction may have been related to a local vasoconstrictor effect of the almitrine on hepatic vessels, to a direct, and potentially toxic, effect of almitrine on hepatocyte, or to both.<sup>22</sup> These effects may have been amplified by the impaired hepatic excretion of bilirubin seen before intravenous almitrine administration in the HL group.

In conclusion, our survey shows that a great improvement in the  $\text{PaO}_2:\text{FiO}_2$  ratio in all patients with ALI who were treated using intravenous almitrine. No alteration in plasma lactate concentration or in results of hepatic function tests were seen in most of these patients during the first 60 h of treatment. However, in some patients with abnormal plasma bilirubin concentrations, an almitrine improvement in arterial oxygenation was associated with lactic acidosis and an alteration in hepatic function test results. Although lactic acidosis and hepatic dysfunction returned to normal after intravenous almitrine was discontinued, arterial oxygenation remained improved for at least 36 h more. Therefore, we suggest

**Table 3. Hepatic Parameters before and 24 h and 60 h after Almitrine Administration (T24 and T60, respectively) in Both HL and LL Groups**

|                             | Group | Before Almitrine Administration | T24       | T60       |
|-----------------------------|-------|---------------------------------|-----------|-----------|
| ALT (IU/l)                  | HL    | 32 ± 11                         | 96 ± 136  | 103 ± 128 |
|                             | LL    | 25 ± 10                         | 23 ± 5    | 25 ± 9    |
| Total bilirubin (μM)        | HL    | 49 ± 54*                        | 57 ± 66   | 59 ± 64   |
|                             | LL    | 15 ± 12                         | 17 ± 22   | 13 ± 12   |
| Alkaline phosphatase (IU/l) | HL    | 79 ± 22                         | 93 ± 42   | 111 ± 39  |
|                             | LL    | 76 ± 39                         | 80 ± 64   | 90 ± 91   |
| Factor II (%)               | HL    | 73 ± 10                         | 68 ± 8    | 78 ± 12   |
|                             | LL    | 67 ± 8                          | 68 ± 5    | 71 ± 12   |
| Factor V (%)                | HL    | 80 ± 15                         | 71 ± 17   | 74 ± 17   |
|                             | LL    | 75 ± 13                         | 82 ± 23   | 86 ± 24   |
| Factor VII (%)              | HL    | 64 ± 15                         | 41 ± 12   | 66 ± 8    |
|                             | LL    | 58 ± 14                         | 58 ± 17   | 65 ± 13   |
| Glucose (mM)                | HL    | 7.9 ± 3.0                       | 8.4 ± 3.1 | 8.7 ± 2.9 |
|                             | LL    | 8.4 ± 3.4                       | 7.7 ± 2.3 | 7.9 ± 2.0 |

At T60 the LL group was still under almitrine treatment, whereas almitrine was stopped at T24 in the HL group. Before almitrine administration, total bilirubin was greater in the HL group than in the LL group (\* $P < 0.01$ ). Intravenous almitrine administration induced in the HL group (a) an ALT increase ( $P < 0.05$ , two-way ANOVA for repeated measures) and (b) a reversible decrease of factor VII ( $P < 0.01$ ).

|                    | MALE (n= 17)            |    |      |    | FEMALE (n= 8) |    |      |    |
|--------------------|-------------------------|----|------|----|---------------|----|------|----|
|                    | Bilirubin (μmol/L) > 17 |    | < 17 |    | > 17          |    | < 17 |    |
| Lactate            | LL                      | HL | LL   | HL | LL            | HL | LL   | HL |
| Number of patients | 4                       | 3  | 10   | 0  | 2             | 3  | 1    | 2  |

**Fig. 3. Patient gender and total bilirubin plasma concentration before almitrine administration were predictive factors for the occurrence of lactic acidosis.**

that almitrine should be administered in short infusions of 12–24 h every 2 or 3 days. Consequently, the cumulative dose of almitrine would be reduced with a potential reduction in toxicity but with a sustained arterial oxygenation improvement. The intracellular mechanism of almitrine-induced hepatic dysfunction remains unclear, and more clinical and experimental studies are necessary. However, we recommend that the lactate concentration be monitored, that biologic hepatic function tests be performed every 12 h during the first 24–48 h of almitrine administration, and that the almitrine infusion be discontinued in cases of severe alteration. The bilirubin concentration before almitrine treatment and patient gender were predictive factors of the occurrence of lactic acidosis and hepatic dysfunction. This association should be confirmed by a larger study.

The authors thank Drs. Bernard Cholley and Randall C. Wetzel for help with revising the manuscript and Professor Eric Vicaut for help with the statistical analysis.

## References

1. Payen D, Gatecel C, Kermarrec N, Beloucif S: Almitrine and inhaled nitric oxide in acute respiratory failure, Nitric Oxide and the Lung. Edited by Zapol W, Bloch K. New York, Marcel Dekker, 1996, pp 313–32
2. Tweney J: Almitrine bismesylate: Current status. *Bull Eur Physio-pathol Resp* 1987; 23(suppl):153S–63S
3. Gherardi R, Louarn F, Benvenuti C, Perrier M, Lejone J, Schaeffer A, Degos J: Peripheral neuropathy in patients treated with almitrine bismesylate. *Lancet* 1985; ii:1247–50
4. Reyes A, Lopez-Messa J, Alonso P: Almitrine in acute respiratory failure. Effects on pulmonary gas exchange and circulation. *Chest* 1987; 91:388–93
5. Reyes A, Roca J, Rodriguez-Roisin R, Torres A, Ussetti P, Wagner P: Effect of almitrine on ventilation-perfusion distribution in adult respiratory distress syndrome. *Am Rev Resp Dis* 1988; 137:1062–7
6. Prost J, Desché P, Jardin F, Margairaz A: Comparison of the effects of intravenous almitrine and positive end-expiratory pressure on pul-



- monary gas exchange in adult respiratory distress syndrome. *Eur Resp J* 1991; 4:683-7
7. Payen DM, Gatecel C, Plaisance P: Almitrine effect on nitric oxide inhalation in adult respiratory distress syndrome. *Lancet* 1993; 341: 1664-5
  8. Wysocki M, Delclaux C, Roupie E, Langeron O, Liu N, Herman B, Lemaire F, Brochard L: Additive effect on gas exchange of inhaled nitric oxide and intravenous almitrine bismesylate in adult respiratory distress syndrome. *Intensive Care Med* 1994; 20:254-9
  9. Lu Q, Mougeon E, Law-Koune J, Roche S, Vezinet C, Abdennour L, Vicaut E, Puybasset L, Diaby M, Coriat P, Rouby J: Dose-response curves of inhaled nitric oxide with and without intravenous almitrine in nitric oxide-responding patients with acute respiratory distress syndrome. *ANESTHESIOLOGY* 1995; 83:929-43
  10. Payen DM: Is nitric oxide inhalation a "cosmetic" therapy in acute respiratory distress syndrome. *Am J Resp Crit Care Med* 1998; 157:1361-2
  11. Sicsic J, Jugan E, Moine P, Edouard A, Samii K: Reversible hepatic cytolysis during almitrine bismesylate treatment for posttraumatic ARDS. *Intensive Care Med* 1996; 22:173-7
  12. Guinard N, Beloucif S, Gatecel C, Mateo J, Payen D: Interest of a therapeutic optimization strategy in severe ARDS. *Chest* 1997; 111: 1000-7
  13. Valtier B, Cholley BP, Belot JP, de la Coussaye J-E, Mateo J, Payen DM: Noninvasive monitoring of cardiac output in critically ill patients using transoesophageal Doppler. *Am J Respir Crit Care Med* 1998; 158:77-83
  14. Le Gall J, Klar J, Lemeshow S, Saulnier F, Alberti C, Artigas A, Teres D: The logistic organ dysfunction system. A new way to assess organ dysfunction in the intensive care unit. *JAMA* 1996; 276: 802-10
  15. Le Gall J, Lemeshow S, Saulnier F: A new Simplified Acute Physiology Score (SAPS II) based on a European/North American multicenter study. *JAMA* 1993; 270:2957-63
  16. Bromet K, Courte S, Aubert Y, Baune A, Balem M, Du Vignaud P: Pharmacokinetics of almitrine bismesylate: Studies in patients. *Eur J Resp Dis* 1983; 64(suppl 126):363-75
  17. Gutierrez G, Wulf ME: Lactic acidosis in sepsis: A commentary. *Intensive Care Med* 1996; 22:6-16
  18. Wolfe RR, Hochachka PW, Trelstad RL, Burke JF: Lactate oxidation in perfused rat lung. *Am J Physiol* 1979; 236:E276-82
  19. Hochachka PW, Liggins GC, Qvist J, Schneider R, Snider MY, Wonders TR, Zapol WM: Pulmonary metabolism during diving: Conditioning blood for the brain. *Science* 1977; 198:831-4
  20. De Backer D, Creteur J, Zhang H, Norrenberg M, Vincent J: Lactate production by the lungs in acute lung injury. *Am J Respir Crit Care Med* 1997; 156:1099-104
  21. Gottschall EB, Fernyak S, Wuertemberger G, Voelkel NF: Almitrine mimics hypoxic vasoconstriction in isolated rat lungs. *Am J Physiol* 1992; 263:H383-91
  22. Leverve XM, Fontaine E, Putod-Paramelle F, Rigoulet M: Decrease in cytosolic ATP/ADP ratio and activation of pyruvate kinase after in vitro addition of almitrine in hepatocytes isolated from fasted rats. *Eur J Biochem* 1994; 224:967-74
  23. Rigoulet M, Fraisse L, Ouhabi R, Guérin B, Fontaine E, Leverve X: Flux-dependent increase in the stoichiometry of charge translocation by mitochondrial ATPase/ATP synthase induced by almitrine. *Biochim Biophys Acta* 1990; 1018:91-7
